# Supplementary material
Source: MDPI journal article supplement (https://www.mdpi.com/2072-4292/10/8/1266)
Supplement: s1 [file s1]

Archive with 1 entries (1 files):
- remotesensing-337932-SI.pdf
